# Supplementary material
Source: PubMed Central journal article supplement (PMC7483432)
Supplement: bloodBLD2020008086-suppl1.pdf [file bloodBLD2020008086-suppl1.pdf]

## Supplementary Table

| Intermediate dose thromboprophylaxis |                                  |                              |                               |
|--------------------------------------|----------------------------------|------------------------------|-------------------------------|
| Weight                               | eGFR >30ml/min                   | eGFR<30ml/min, not on RRT    | On continuous haemofiltration |
| <50kg                                | Enoxaparin 40mg sc od<br>+/- SCD | UFH 5000U sc bd<br>+/- SCD   | Systemic iv UFH infusion      |
| 50-100kg                             | Enoxaparin 40mg sc bd<br>+/- SCD | UFH 5000U sc tds<br>+/- SCD  |                               |
| 101-150kg                            | Enoxaparin 60mg sc bd<br>+/- SCD | UFH 10 000U sc bd<br>+/- SCD |                               |
| >150kg                               | Enoxaparin 80mg sc bd<br>+/- SCD | UFH 12 500U sc bd<br>+/- SCD |                               |

GFR, glomerular filtration rate; sc, subcutaneous; SCD, sequential compression device; bd, twice daily; tds, three times daily; UFH, unfractionated heparin.
